# Supplementary material
Source: PubMed Central journal article supplement (PMC2647804)
Supplement: NIHMS89704-supplement-pdf.pdf [file NIHMS89704-supplement-pdf.pdf]

**Suppl. Table 1. Modulation of host cell genes involved in the regulation of the cell cycle by *T. gondii*<sup>a</sup>.**

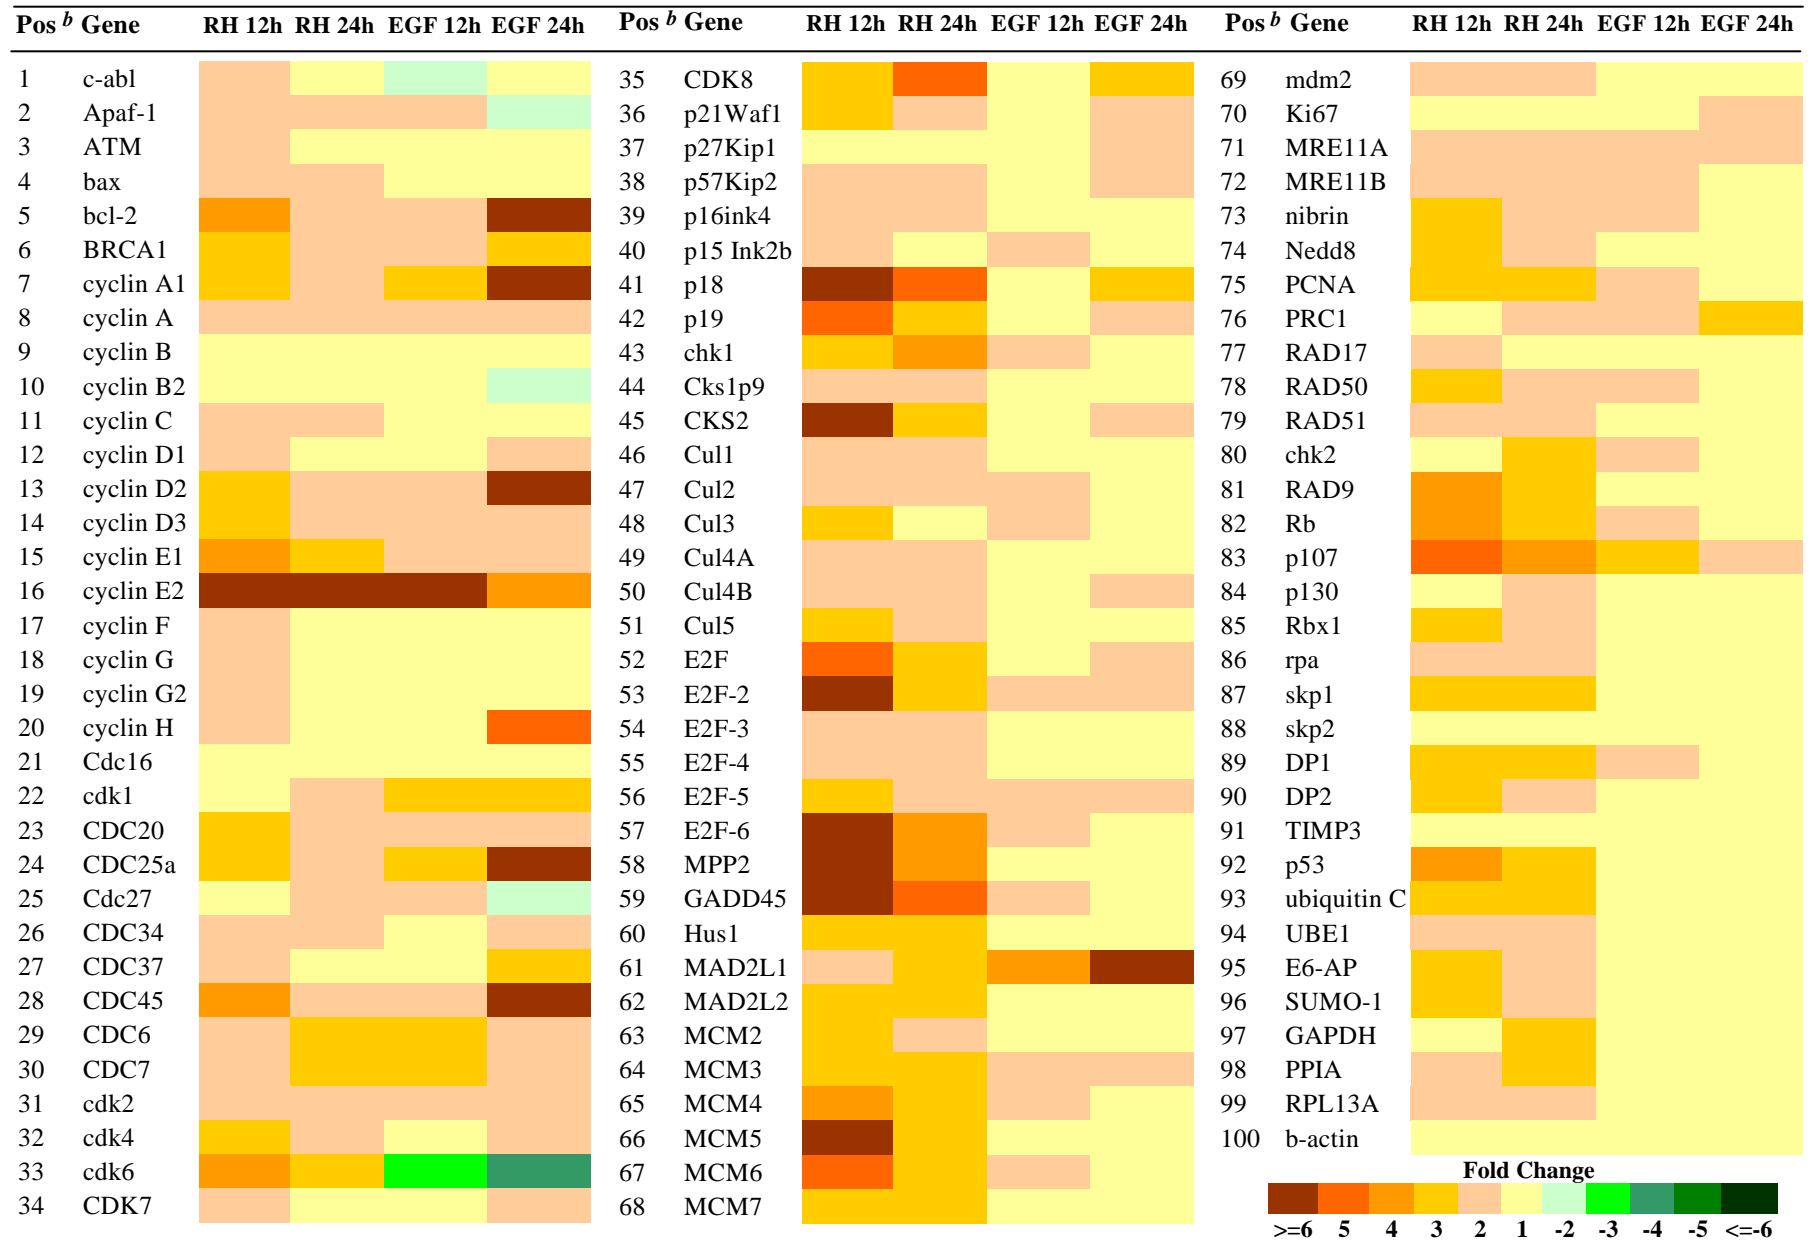

<sup>a</sup> Densitometric values were normalized to actin and levels of gene expression are shown as infected/uninfected ratios. Data represent the means of two experiments. <sup>b</sup> Position in the array.

**Suppl. Table 2. Modulation of host cell genes involved in the regulation of the cell cycle by *T. gondii*<sup>a</sup>.**

| Pos <sup>b</sup> | Gene      | RH 12h |      | RH 24h |      | EGF 12h |      | EGF 24h |       | Pos <sup>b</sup> | Gene     | RH 12h |      | RH 24h |      | EGF 12h |      | EGF 24h |      | Pos <sup>b</sup> | Gene        | RH 12h |      | RH 24h |      | EGF 12h |      | EGF 24h |      |
|------------------|-----------|--------|------|--------|------|---------|------|---------|-------|------------------|----------|--------|------|--------|------|---------|------|---------|------|------------------|-------------|--------|------|--------|------|---------|------|---------|------|
|                  |           | Exp1   | Exp2 | Exp1   | Exp2 | Exp1    | Exp2 | Exp1    | Exp2  |                  |          | Exp1   | Exp2 | Exp1   | Exp2 | Exp1    | Exp2 | Exp1    | Exp2 |                  |             | Exp1   | Exp2 | Exp1   | Exp2 | Exp1    | Exp2 | Exp1    | Exp2 |
| 1                | c-abl     | 0.6    | 3.0  | 0.4    | 2.3  | 0.3     | 0.8  | 0.5     | 1.6   | 35               | CDK8     | 1.6    | 5.3  | 0.9    | 9.0  | 0.6     | 2.2  | 0.4     | 5.3  | 69               | mdm2        | 1.7    | 2.4  | 2.3    | 2.5  | 1.1     | 1.4  | 1.6     | 0.9  |
| 2                | Apaf-1    | 2.6    | 0.6  | 0.9    | 2.8  | 3.0     | 0.2  | 0.5     | 0.5   | 36               | p21Waf1  | 1.2    | 4.9  | 0.6    | 3.5  | 0.4     | 1.3  | 0.3     | 4.8  | 70               | Ki67        | 0.7    | 1.9  | 1.1    | 1.3  | 1.1     | 0.9  | 4.2     | 0.2  |
| 3                | ATM       | 2.4    | 1.6  | 1.0    | 1.9  | 1.4     | 0.9  | 1.2     | 0.8   | 37               | p27Kip1  | 1.3    | 1.7  | 1.4    | 1.1  | 0.7     | 1.1  | 0.3     | 3.3  | 71               | MRE11A      | 2.2    | 2.6  | 1.8    | 1.7  | 2.0     | 1.6  | 2.8     | 0.6  |
| 4                | bax       | 1.3    | 3.3  | 1.0    | 2.4  | 0.6     | 1.3  | 0.5     | 2.5   | 38               | p57Kip2  | 1.0    | 2.7  | 0.7    | 2.8  | 0.6     | 2.2  | 0.6     | 3.7  | 72               | MRE11B      | 2.2    | 2.3  | 2.1    | 2.4  | 2.2     | 1.5  | 2.3     | 0.6  |
| 5                | bcl-2     | 0.6    | 8.1  | 1.0    | 4.0  | 0.3     | 4.8  | 0.1     | 90.8  | 39               | p16ink4  | 2.0    | 2.0  | 0.5    | 2.9  | 1.5     | 1.3  | 1.0     | 1.2  | 73               | nibrin      | 3.2    | 2.2  | 1.3    | 2.4  | 1.7     | 1.7  | 1.9     | 0.9  |
| 6                | BRCA1     | 0.8    | 4.4  | 0.9    | 3.8  | 0.6     | 3.4  | 0.5     | 6.4   | 40               | p15Ink2b | 2.3    | 2.5  | 0.2    | 3.1  | 1.6     | 1.8  | 1.3     | 1.4  | 74               | Nedd8       | 2.2    | 3.0  | 2.3    | 2.6  | 1.1     | 1.3  | 1.3     | 1.0  |
| 7                | cyclin A1 | 0.5    | 6.4  | 0.5    | 3.5  | 0.2     | 5.3  | 0.0     | 264.1 | 41               | p18      | 0.9    | 31.8 | 1.3    | 8.9  | 0.5     | 0.7  | 0.1     | 6.3  | 75               | PCNA        | 1.9    | 6.7  | 4.2    | 2.5  | 1.5     | 2.2  | 2.0     | 1.1  |
| 8                | cyclin A  | 1.0    | 3.1  | 1.1    | 2.1  | 1.0     | 2.5  | 1.8     | 1.4   | 42               | p19      | 1.5    | 8.0  | 1.4    | 4.4  | 0.9     | 1.6  | 0.5     | 3.2  | 76               | PRC1        | 1.1    | 1.3  | 2.0    | 1.3  | 2.4     | 1.2  | 5.5     | 0.2  |
| 9                | cyclin B  | 1.2    | 0.7  | 0.8    | 1.7  | 1.1     | 0.3  | 2.7     | 0.1   | 43               | chk1     | 3.1    | 3.1  | 2.5    | 5.0  | 3.2     | 1.6  | 1.8     | 0.9  | 77               | RAD17       | 1.5    | 2.0  | 1.7    | 1.4  | 1.0     | 0.8  | 2.0     | 0.4  |
| 10               | cyclin B2 | 1.1    | 0.5  | 0.5    | 1.2  | 2.0     | 0.2  | 0.9     | 0.2   | 44               | Cks1p9   | 1.1    | 3.4  | 1.3    | 3.1  | 0.8     | 1.6  | 0.9     | 1.6  | 78               | RAD50       | 1.9    | 3.6  | 1.5    | 1.7  | 1.3     | 1.9  | 1.5     | 1.3  |
| 11               | cyclin C  | 1.7    | 2.6  | 1.2    | 2.2  | 0.8     | 1.2  | 0.6     | 1.9   | 45               | CKS2     | 4.3    | 6.9  | 3.0    | 3.4  | 0.8     | 1.5  | 2.7     | 0.5  | 79               | RAD51       | 2.8    | 2.0  | 1.3    | 3.4  | 1.8     | 0.7  | 1.9     | 0.4  |
| 12               | cyclin D1 | 1.1    | 2.6  | 1.1    | 1.8  | 1.1     | 1.7  | 0.7     | 2.5   | 46               | Cul1     | 3.0    | 1.8  | 1.3    | 2.4  | 1.6     | 0.9  | 2.0     | 0.4  | 80               | chk2        | 2.2    | 0.2  | 1.6    | 3.8  | 4.7     | 0.1  | 1.2     | 0.1  |
| 13               | cyclin D2 | 0.5    | 6.6  | 0.5    | 4.1  | 0.4     | 3.8  | 0.3     | 11.0  | 47               | Cul2     | 3.5    | 1.5  | 1.1    | 3.2  | 2.5     | 1.0  | 1.3     | 0.8  | 81               | RAD9        | 3.0    | 5.1  | 2.8    | 2.7  | 1.4     | 1.2  | 1.4     | 0.9  |
| 14               | cyclin D3 | 0.7    | 4.5  | 0.8    | 4.0  | 0.6     | 3.3  | 1.1     | 3.0   | 48               | Cul3     | 3.1    | 3.3  | 0.8    | 2.0  | 1.7     | 1.5  | 2.0     | 0.8  | 82               | Rb          | 3.4    | 4.5  | 3.1    | 3.3  | 2.1     | 2.4  | 1.8     | 1.3  |
| 15               | cyclin E1 | 2.3    | 6.2  | 0.7    | 5.9  | 1.2     | 2.3  | 0.9     | 2.7   | 49               | Cul4A    | 1.5    | 3.6  | 1.2    | 2.0  | 1.2     | 1.0  | 0.7     | 1.4  | 83               | p107        | 2.7    | 6.9  | 4.4    | 3.0  | 2.6     | 3.4  | 2.6     | 1.3  |
| 16               | cyclin E2 | 6.0    | 16.8 | 5.0    | 20.4 | 5.2     | 11.4 | 1.6     | 7.0   | 50               | Cul4B    | 1.4    | 2.2  | 1.6    | 1.8  | 1.2     | 2.0  | 0.8     | 2.4  | 84               | p130        | 1.2    | 1.0  | 3.1    | 1.5  | 1.0     | 0.3  | 2.1     | 0.1  |
| 17               | cyclin F  | 1.1    | 3.1  | 0.3    | 2.4  | 0.5     | 0.8  | 0.7     | 1.1   | 51               | Cul5     | 1.9    | 4.2  | 1.7    | 2.2  | 1.2     | 1.7  | 0.9     | 1.9  | 85               | Rbx1        | 2.3    | 3.4  | 2.8    | 2.3  | 1.4     | 1.2  | 1.8     | 0.7  |
| 18               | cyclin G  | 1.5    | 2.7  | 0.6    | 1.8  | 0.9     | 1.5  | 1.1     | 1.4   | 52               | E2F      | 1.3    | 8.0  | 2.4    | 3.1  | 0.9     | 1.8  | 0.5     | 3.5  | 86               | rpa         | 2.3    | 2.3  | 1.8    | 2.7  | 1.4     | 1.2  | 2.5     | 0.5  |
| 19               | cyclin G2 | 1.9    | 1.7  | 0.8    | 1.3  | 0.6     | 0.6  | 0.8     | 0.8   | 53               | E2F-2    | 2.7    | 8.8  | 3.1    | 3.1  | 1.5     | 2.7  | 1.1     | 2.5  | 87               | skp1        | 3.6    | 3.0  | 1.8    | 3.4  | 1.9     | 1.2  | 2.2     | 0.5  |
| 20               | cyclin H  | 0.8    | 4.0  | 0.6    | 2.3  | 0.3     | 2.1  | 0.2     | 9.4   | 54               | E2F-3    | 1.7    | 2.9  | 1.2    | 2.1  | 1.2     | 1.1  | 1.1     | 1.0  | 88               | skp2        | 1.6    | 1.2  | 0.8    | 2.1  | 1.4     | 1.2  | 1.5     | 0.8  |
| 21               | Cdc16     | 1.0    | 2.1  | 0.9    | 1.6  | 0.8     | 1.4  | 0.9     | 1.6   | 55               | E2F-4    | 2.4    | 2.2  | 1.1    | 2.4  | 1.5     | 1.5  | 1.5     | 1.0  | 89               | DPI         | 3.1    | 2.0  | 2.2    | 3.2  | 2.6     | 1.0  | 2.0     | 0.5  |
| 22               | cdk1      | 0.6    | 2.3  | 1.9    | 2.9  | 1.7     | 4.1  | 5.5     | 0.7   | 56               | E2F-5    | 2.6    | 3.2  | 0.9    | 2.7  | 1.2     | 2.6  | 1.5     | 1.7  | 90               | DP2         | 2.4    | 3.6  | 2.4    | 2.1  | 0.9     | 0.9  | 1.3     | 0.7  |
| 23               | CDC20     | 0.5    | 5.0  | 0.7    | 3.2  | 0.6     | 4.2  | 1.7     | 2.5   | 57               | E2F-6    | 3.1    | 9.0  | 3.7    | 3.8  | 1.6     | 1.7  | 0.7     | 2.4  | 91               | TIMP3       | 1.0    | 1.5  | 2.2    | 0.9  | 1.4     | 1.3  | 1.5     | 0.8  |
| 24               | CDC25a    | 0.7    | 5.3  | 0.2    | 4.8  | 0.4     | 4.9  | 0.3     | 18.2  | 58               | MPP2     | 1.7    | 15.0 | 2.9    | 5.5  | 1.1     | 1.8  | 1.0     | 1.8  | 92               | p53         | 2.4    | 5.4  | 4.3    | 2.1  | 0.9     | 1.1  | 1.5     | 0.7  |
| 25               | Cdc27     | 2.2    | 0.8  | 0.9    | 3.7  | 3.1     | 0.3  | 0.8     | 0.4   | 59               | GADD45   | 3.6    | 10.0 | 3.8    | 5.5  | 2.1     | 2.1  | 1.2     | 1.7  | 93               | ubiquitin C | 2.3    | 3.7  | 3.6    | 2.0  | 1.5     | 1.2  | 2.0     | 0.6  |
| 26               | CDC34     | 0.9    | 3.3  | 0.4    | 2.9  | 0.5     | 2.0  | 0.5     | 3.7   | 60               | Hus1     | 2.1    | 4.4  | 2.3    | 2.8  | 1.2     | 1.4  | 1.6     | 0.9  | 94               | UBE1        | 2.0    | 1.6  | 1.1    | 2.5  | 1.4     | 1.3  | 1.7     | 0.8  |
| 27               | CDC37     | 1.0    | 4.1  | 0.6    | 2.4  | 0.4     | 1.8  | 0.4     | 5.1   | 61               | MAD2L1   | 2.4    | 2.1  | 2.6    | 3.0  | 4.9     | 2.5  | 11.7    | 0.2  | 95               | E6-AP       | 3.0    | 2.4  | 1.7    | 2.8  | 1.1     | 1.2  | 1.6     | 0.8  |
| 28               | CDC45     | 0.2    | 8.2  | 0.0    | 4.8  | 0.1     | 3.7  | 0.1     | 48.1  | 62               | MAD2L2   | 0.9    | 5.9  | 2.3    | 3.1  | 1.0     | 1.8  | 2.1     | 0.9  | 96               | SUMO-1      | 2.4    | 3.4  | 2.8    | 0.9  | 1.1     | 1.6  | 1.4     | 1.2  |
| 29               | CDC6      | 0.9    | 2.5  | 1.0    | 5.5  | 2.3     | 2.9  | 0.9     | 3.3   | 63               | MCM2     | 1.5    | 3.9  | 1.9    | 2.5  | 1.2     | 1.3  | 1.6     | 0.8  | 97               | GAPDH       | 1.9    | 1.2  | 2.3    | 3.2  | 1.2     | 0.9  | 1.4     | 0.7  |
| 30               | CDC7      | 0.9    | 3.9  | 1.1    | 4.4  | 0.9     | 4.5  | 2.2     | 2.1   | 64               | MCM3     | 1.3    | 4.0  | 1.8    | 3.8  | 0.9     | 2.7  | 1.2     | 2.3  | 98               | PPIA        | 2.5    | 2.1  | 3.8    | 3.2  | 1.4     | 1.2  | 1.1     | 1.2  |
| 31               | cdk2      | 1.3    | 3.4  | 0.8    | 4.2  | 1.1     | 2.7  | 1.3     | 2.0   | 65               | MCM4     | 2.3    | 5.8  | 3.9    | 4.1  | 1.6     | 2.0  | 1.6     | 1.3  | 99               | RPL13A      | 1.8    | 1.8  | 2.8    | 1.8  | 0.9     | 0.9  | 1.2     | 0.8  |
| 32               | cdk4      | 1.2    | 4.1  | 0.4    | 3.2  | 0.5     | 1.6  | 0.5     | 3.3   | 66               | MCM5     | 1.7    | 10.7 | 3.6    | 3.1  | 1.1     | 1.9  | 1.2     | 1.6  | 100              | b-actin     | 1.0    | 1.0  | 1.0    | 1.0  | 1.0     | 1.0  | 1.0     | 1.0  |
| 33               | cdk6      | 1.1    | 7.2  | 0.4    | 6.5  | 0.6     | 0.1  | 0.2     | 0.4   | 67               | MCM6     | 1.8    | 8.5  | 5.1    | 2.5  | 1.3     | 2.1  | 0.9     | 2.3  |                  |             |        |      |        |      |         |      |         |      |
| 34               | CDK7      | 1.3    | 2.2  | 0.4    | 1.7  | 0.8     | 1.1  | 0.4     | 2.9   | 68               | MCM7     | 1.7    | 4.1  | 3.9    | 2.2  | 1.6     | 1.4  | 2.2     | 0.6  |                  |             |        |      |        |      |         |      |         |      |

<sup>a</sup> Densitometric values were normalized to actin and levels of gene expression are shown as infected/uninfected ratios. Data represent two experiments performed for each time point. <sup>b</sup> Position in the array.
